# Supplementary material for: Identification of Electronic and Structural Descriptors of Adenosine Analogues Related to Inhibition of Leishmanial Glyceraldehyde-3-Phosphate Dehydrogenase
Source: Molecules. 2013 Apr 29;18(5):5032–50. doi: 10.3390/molecules18055032 (PMC6269754; doi:10.3390/molecules18055032)
Supplement: Supplementary file 1 [file molecules-18-05032-s001.pdf]

## Supplemental Materials

**Table S1.** Experimental and predicted pIC<sub>50</sub> values.

| Compound | Training set compounds            |                                      |                                      |                                      |
|----------|-----------------------------------|--------------------------------------|--------------------------------------|--------------------------------------|
|          | Experimental<br>pIC <sub>50</sub> | Predicted pIC <sub>50</sub><br>(PLS) | Predicted pIC <sub>50</sub><br>(PCR) | Predicted pIC <sub>50</sub><br>(MLR) |
| 1        | 5.70                              | 5.50                                 | 5.47                                 | 5.48                                 |
| 2        | 5.70                              | 5.17                                 | 5.12                                 | 5.13                                 |
| 3        | 5.70                              | 5.15                                 | 5.12                                 | 5.25                                 |
| 4        | 5.70                              | 5.35                                 | 5.36                                 | 5.30                                 |
| 5        | 5.40                              | 4.80                                 | 4.85                                 | 4.78                                 |
| 6        | 5.30                              | 4.92                                 | 4.96                                 | 4.86                                 |
| 7        | 5.30                              | 5.29                                 | 5.30                                 | 5.23                                 |
| 8        | 5.26                              | 4.84                                 | 4.87                                 | 4.73                                 |
| 9        | 5.22                              | 5.11                                 | 5.14                                 | 4.95                                 |
| 10       | 5.00                              | 4.76                                 | 4.80                                 | 4.70                                 |
| 11       | 5.00                              | 4.97                                 | 4.91                                 | 5.11                                 |
| 12       | 5.00                              | 4.44                                 | 4.45                                 | 4.56                                 |
| 13       | 4.92                              | 4.82                                 | 4.86                                 | 4.82                                 |
| 14       | 4.70                              | 4.43                                 | 4.32                                 | 4.43                                 |
| 15       | 4.60                              | 4.43                                 | 4.37                                 | 4.60                                 |
| 16       | 4.60                              | 4.66                                 | 4.63                                 | 4.53                                 |
| 17       | 4.60                              | 5.16                                 | 5.11                                 | 5.24                                 |
| 18       | 4.60                              | 4.42                                 | 4.41                                 | 4.53                                 |
| 19       | 4.60                              | 4.95                                 | 4.93                                 | 4.92                                 |
| 20       | 4.60                              | 5.14                                 | 5.17                                 | 5.13                                 |
| 21       | 4.60                              | 4.88                                 | 4.90                                 | 4.71                                 |
| 22       | 4.60                              | 4.47                                 | 4.48                                 | 4.62                                 |
| 23       | 4.60                              | 4.85                                 | 4.84                                 | 5.22                                 |
| 24       | 4.60                              | 4.94                                 | 4.97                                 | 5.05                                 |
| 25       | 4.30                              | 5.26                                 | 5.23                                 | 5.33                                 |
| 26       | 4.10                              | 4.37                                 | 4.39                                 | 4.38                                 |
| 27       | 4.10                              | 4.73                                 | 4.79                                 | 4.77                                 |
| 28       | 4.00                              | 4.58                                 | 4.56                                 | 4.75                                 |
| 29       | 4.00                              | 3.48                                 | 3.45                                 | 3.58                                 |
| 30       | 3.60                              | 3.11                                 | 3.17                                 | 3.31                                 |
| 31       | 3.60                              | 3.37                                 | 3.34                                 | 3.29                                 |
| 32       | 3.52                              | 3.94                                 | 3.99                                 | 3.60                                 |
| 33       | 3.44                              | 3.19                                 | 3.22                                 | 3.12                                 |
| 34       | 3.40                              | 3.23                                 | 3.15                                 | 3.22                                 |
| 35       | 3.30                              | 3.09                                 | 2.99                                 | 3.00                                 |
| 36       | 3.30                              | 3.41                                 | 3.40                                 | 3.43                                 |
| 37       | 3.30                              | 3.07                                 | 3.07                                 | 3.09                                 |
| 38       | 3.22                              | 3.17                                 | 3.24                                 | 3.52                                 |
| 39       | 3.15                              | 3.16                                 | 3.21                                 | 3.29                                 |

Table S1. Cont.

| Compound | Test set compounds                |                                      |                                      |                                      |
|----------|-----------------------------------|--------------------------------------|--------------------------------------|--------------------------------------|
|          | Experimental<br>pIC <sub>50</sub> | Predicted pIC <sub>50</sub><br>(PLS) | Predicted pIC <sub>50</sub><br>(PCR) | Predicted pIC <sub>50</sub><br>(MLR) |
| 40       | 3.12                              | 3.07                                 | 3.07                                 | 2.67                                 |
| 41       | 2.80                              | 2.60                                 | 2.65                                 | 2.81                                 |
| 42       | 2.62                              | 3.53                                 | 3.55                                 | 3.17                                 |
| 43       | 2.52                              | 2.66                                 | 2.64                                 | 2.60                                 |
| 44       | 2.48                              | 2.80                                 | 2.80                                 | 2.76                                 |
| 45       | 2.40                              | 2.70                                 | 2.66                                 | 2.22                                 |
| 46       | 2.40                              | 2.27                                 | 2.35                                 | 2.83                                 |
| 47       | 2.22                              | 2.83                                 | 2.70                                 | 2.74                                 |
| 48       | 5.70                              | 5.65                                 | 5.64                                 | 5.75                                 |
| 49       | 5.40                              | 5.01                                 | 5.03                                 | 5.28                                 |
| 50       | 5.30                              | 5.16                                 | 5.19                                 | 5.47                                 |
| 51       | 5.00                              | 5.00                                 | 4.99                                 | 5.32                                 |
| 52       | 4.74                              | 4.60                                 | 4.64                                 | 4.61                                 |
| 53       | 4.43                              | 4.52                                 | 4.54                                 | 4.68                                 |
| 54       | 4.22                              | 4.43                                 | 4.42                                 | 4.89                                 |
| 55       | 3.82                              | 4.65                                 | 4.68                                 | 4.62                                 |
| 56       | 3.70                              | 3.49                                 | 3.57                                 | 3.51                                 |
| 57       | 3.44                              | 3.31                                 | 3.33                                 | 3.45                                 |
| 58       | 3.22                              | 3.09                                 | 3.05                                 | 3.28                                 |
| 59       | 3.15                              | 3.61                                 | 3.53                                 | 3.28                                 |
| 60       | 2.80                              | 2.89                                 | 2.89                                 | 2.75                                 |
| 61       | 2.52                              | 2.10                                 | 2.08                                 | 1.96                                 |

**Table S2.** Calculation of ranks, absolute values of differences and their sums.

|    | Average | rnk | Training set |      |       |       |      |       |       |      |       |      |      |       |
|----|---------|-----|--------------|------|-------|-------|------|-------|-------|------|-------|------|------|-------|
|    |         |     | V1           | rnk1 | diff1 | V2    | rnk2 | diff2 | V3    | rnk3 | diff3 | V4   | rnk4 | diff4 |
| 46 | 2.46    | 1   | 2.26866      | 1    | 0     | 2.351 | 1    | 0     | 2.83  | 7    | 6     | 2.4  | 2    | 1     |
| 45 | 2.50    | 2   | 2.69998      | 4    | 2     | 2.66  | 4    | 2     | 2.222 | 1    | 1     | 2.4  | 3    | 1     |
| 43 | 2.60    | 3   | 2.66338      | 3    | 0     | 2.637 | 2    | 1     | 2.599 | 2    | 1     | 2.52 | 5    | 2     |
| 47 | 2.62    | 4   | 2.8263       | 6    | 2     | 2.704 | 5    | 1     | 2.737 | 4    | 0     | 2.22 | 1    | 3     |
| 44 | 2.71    | 5   | 2.79536      | 5    | 0     | 2.798 | 6    | 1     | 2.755 | 5    | 0     | 2.48 | 4    | 1     |
| 41 | 2.72    | 6   | 2.59998      | 2    | 4     | 2.651 | 3    | 3     | 2.814 | 6    | 0     | 2.8  | 7    | 1     |
| 40 | 2.98    | 7   | 3.06781      | 7    | 0     | 3.073 | 8    | 1     | 2.674 | 3    | 4     | 3.12 | 8    | 1     |
| 35 | 3.09    | 8   | 3.08546      | 9    | 1     | 2.986 | 7    | 1     | 3.001 | 8    | 0     | 3.3  | 11   | 3     |
| 37 | 3.13    | 9   | 3.06854      | 8    | 1     | 3.074 | 9    | 0     | 3.091 | 9    | 0     | 3.3  | 12   | 3     |
| 39 | 3.20    | 10  | 3.15542      | 11   | 1     | 3.21  | 12   | 2     | 3.292 | 14   | 4     | 3.15 | 9    | 1     |
| 42 | 3.22    | 11  | 3.52814      | 18   | 7     | 3.546 | 18   | 7     | 3.171 | 11   | 0     | 2.62 | 6    | 5     |
| 33 | 3.24    | 12  | 3.18878      | 13   | 1     | 3.216 | 13   | 1     | 3.122 | 10   | 2     | 3.44 | 15   | 3     |
| 34 | 3.25    | 13  | 3.2277       | 14   | 1     | 3.155 | 10   | 3     | 3.215 | 12   | 1     | 3.4  | 14   | 1     |
| 38 | 3.29    | 14  | 3.16862      | 12   | 2     | 3.243 | 14   | 0     | 3.518 | 17   | 3     | 3.22 | 10   | 4     |
| 30 | 3.30    | 15  | 3.11208      | 10   | 5     | 3.174 | 11   | 4     | 3.308 | 15   | 0     | 3.6  | 17   | 2     |
| 36 | 3.39    | 16  | 3.41321      | 16   | 0     | 3.404 | 16   | 0     | 3.429 | 16   | 0     | 3.3  | 13   | 3     |
| 31 | 3.40    | 17  | 3.37056      | 15   | 2     | 3.341 | 15   | 2     | 3.291 | 13   | 4     | 3.6  | 18   | 1     |
| 29 | 3.63    | 18  | 3.47506      | 17   | 1     | 3.445 | 17   | 1     | 3.583 | 18   | 0     | 4    | 19   | 1     |
| 32 | 3.76    | 19  | 3.93572      | 19   | 0     | 3.986 | 19   | 0     | 3.601 | 19   | 0     | 3.52 | 16   | 3     |
| 26 | 4.31    | 20  | 4.37487      | 20   | 0     | 4.392 | 22   | 2     | 4.381 | 20   | 0     | 4.1  | 21   | 1     |
| 14 | 4.47    | 21  | 4.43016      | 23   | 2     | 4.324 | 20   | 1     | 4.434 | 21   | 0     | 4.7  | 34   | 13    |
| 28 | 4.47    | 22  | 4.57751      | 26   | 4     | 4.565 | 26   | 4     | 4.75  | 30   | 8     | 4    | 20   | 2     |
| 18 | 4.49    | 23  | 4.41525      | 21   | 2     | 4.409 | 23   | 0     | 4.527 | 23   | 0     | 4.6  | 24   | 1     |
| 15 | 4.50    | 24  | 4.42738      | 22   | 2     | 4.365 | 21   | 3     | 4.602 | 25   | 1     | 4.6  | 25   | 1     |
| 22 | 4.54    | 25  | 4.46704      | 25   | 0     | 4.482 | 25   | 0     | 4.622 | 26   | 1     | 4.6  | 26   | 1     |
| 27 | 4.60    | 26  | 4.72796      | 28   | 2     | 4.791 | 28   | 2     | 4.77  | 31   | 5     | 4.1  | 22   | 4     |
| 16 | 4.60    | 27  | 4.66037      | 27   | 0     | 4.634 | 27   | 0     | 4.525 | 22   | 5     | 4.6  | 27   | 0     |
| 12 | 4.61    | 28  | 4.43973      | 24   | 4     | 4.449 | 24   | 4     | 4.561 | 24   | 4     | 5    | 36   | 8     |
| 21 | 4.77    | 29  | 4.88470      | 34   | 5     | 4.899 | 34   | 5     | 4.705 | 28   | 1     | 4.6  | 28   | 1     |
| 10 | 4.82    | 30  | 4.76018      | 29   | 1     | 4.802 | 29   | 1     | 4.702 | 27   | 3     | 5    | 37   | 7     |
| 19 | 4.85    | 31  | 4.94794      | 37   | 6     | 4.925 | 36   | 5     | 4.917 | 35   | 4     | 4.6  | 29   | 2     |
| 13 | 4.85    | 32  | 4.8172       | 31   | 1     | 4.862 | 32   | 0     | 4.817 | 33   | 1     | 4.92 | 35   | 3     |
| 23 | 4.88    | 33  | 4.85248      | 33   | 0     | 4.844 | 30   | 3     | 5.219 | 41   | 8     | 4.6  | 30   | 3     |
| 24 | 4.89    | 34  | 4.94434      | 36   | 2     | 4.975 | 38   | 4     | 5.045 | 37   | 3     | 4.6  | 31   | 3     |
| 8  | 4.92    | 35  | 4.8423       | 32   | 3     | 4.869 | 33   | 2     | 4.728 | 29   | 6     | 5.26 | 40   | 5     |
| 5  | 4.96    | 36  | 4.80034      | 30   | 6     | 4.847 | 31   | 5     | 4.777 | 32   | 4     | 5.4  | 43   | 7     |
| 11 | 5.00    | 37  | 4.96811      | 38   | 1     | 4.911 | 35   | 2     | 5.112 | 38   | 1     | 5    | 38   | 1     |
| 20 | 5.01    | 38  | 5.14051      | 40   | 2     | 5.17  | 43   | 5     | 5.126 | 39   | 1     | 4.6  | 32   | 6     |
| 6  | 5.01    | 39  | 4.91854      | 35   | 4     | 4.961 | 37   | 2     | 4.86  | 34   | 5     | 5.3  | 41   | 2     |
| 17 | 5.03    | 40  | 5.16119      | 42   | 2     | 5.109 | 39   | 1     | 5.236 | 43   | 3     | 4.6  | 33   | 7     |
| 25 | 5.03    | 41  | 5.26368      | 44   | 3     | 5.229 | 44   | 3     | 5.325 | 46   | 5     | 4.3  | 23   | 18    |
| 9  | 5.11    | 42  | 5.11402      | 39   | 3     | 5.142 | 42   | 0     | 4.947 | 36   | 6     | 5.22 | 39   | 3     |
| 7  | 5.28    | 43  | 5.28582      | 45   | 2     | 5.299 | 45   | 2     | 5.225 | 42   | 1     | 5.3  | 42   | 1     |

Table S2. Cont.

| Training set |         |     |         |      |       |       |      |       |       |      |       |      |      |       |
|--------------|---------|-----|---------|------|-------|-------|------|-------|-------|------|-------|------|------|-------|
|              | Average | rnk | V1      | rnk1 | diff1 | V2    | rnk2 | diff2 | V3    | rnk3 | diff3 | V4   | rnk4 | diff4 |
| 2            | 5.28    | 44  | 5.17056 | 43   | 1     | 5.121 | 41   | 3     | 5.128 | 40   | 4     | 5.7  | 44   | 0     |
| 3            | 5.31    | 45  | 5.15466 | 41   | 4     | 5.12  | 40   | 5     | 5.247 | 44   | 1     | 5.7  | 45   | 0     |
| 4            | 5.43    | 46  | 5.35338 | 46   | 0     | 5.359 | 46   | 0     | 5.298 | 45   | 1     | 5.7  | 46   | 0     |
| 1            | 5.54    | 47  | 5.49568 | 47   | 0     | 5.475 | 47   | 0     | 5.477 | 47   | 0     | 5.7  | 47   | 0     |
|              |         |     | Sum     | 92   |       |       |      | 94    |       |      | 108   |      |      | 140   |
| 61           | 2.16    | 1   | 2.09768 | 1    | 0     | 2.075 | 1    | 0     | 1.959 | 1    | 0     | 2.52 | 1    | 0     |
| 60           | 2.83    | 2   | 2.89118 | 2    | 0     | 2.894 | 2    | 0     | 2.745 | 2    | 0     | 2.8  | 2    | 0     |
| 58           | 3.16    | 3   | 3.08913 | 3    | 0     | 3.048 | 3    | 0     | 3.279 | 4    | 1     | 3.22 | 4    | 1     |
| 57           | 3.38    | 4   | 3.31273 | 4    | 0     | 3.328 | 4    | 0     | 3.446 | 5    | 1     | 3.44 | 5    | 1     |
| 59           | 3.39    | 5   | 3.60661 | 6    | 1     | 3.527 | 5    | 0     | 3.277 | 3    | 2     | 3.15 | 3    | 2     |
| 56           | 3.57    | 6   | 3.49328 | 5    | 1     | 3.571 | 6    | 0     | 3.509 | 6    | 0     | 3.7  | 6    | 0     |
| 55           | 4.44    | 7   | 4.64639 | 10   | 3     | 4.684 | 10   | 3     | 4.624 | 8    | 1     | 3.82 | 7    | 0     |
| 54           | 4.49    | 8   | 4.43297 | 7    | 1     | 4.425 | 7    | 1     | 4.887 | 10   | 2     | 4.22 | 8    | 0     |
| 53           | 4.54    | 9   | 4.5185  | 8    | 1     | 4.538 | 8    | 1     | 4.683 | 9    | 0     | 4.43 | 9    | 0     |
| 52           | 4.65    | 10  | 4.59673 | 9    | 1     | 4.645 | 9    | 1     | 4.613 | 7    | 3     | 4.74 | 10   | 0     |
| 51           | 5.08    | 11  | 5.00052 | 11   | 0     | 4.985 | 11   | 0     | 5.321 | 12   | 1     | 5    | 11   | 0     |
| 49           | 5.18    | 12  | 5.00585 | 12   | 0     | 5.034 | 12   | 0     | 5.281 | 11   | 1     | 5.4  | 13   | 1     |
| 50           | 5.28    | 13  | 5.16101 | 13   | 0     | 5.194 | 13   | 0     | 5.469 | 13   | 0     | 5.3  | 12   | 1     |
| 48           | 5.68    | 14  | 5.64711 | 14   | 0     | 5.644 | 14   | 0     | 5.746 | 14   | 0     | 5.7  | 14   | 0     |
|              |         |     | Sum     | 8    |       |       |      | 6     |       |      | 12    |      |      | 6     |
